# Supplementary material
Source: PubMed Central journal article supplement (PMC6446204)

# Fig. 2G source data

Data imaged with Xographer and film

MW markers visible are Thermo PageRuler Prestained protein ladder (ThermoFischer)

## BTAf

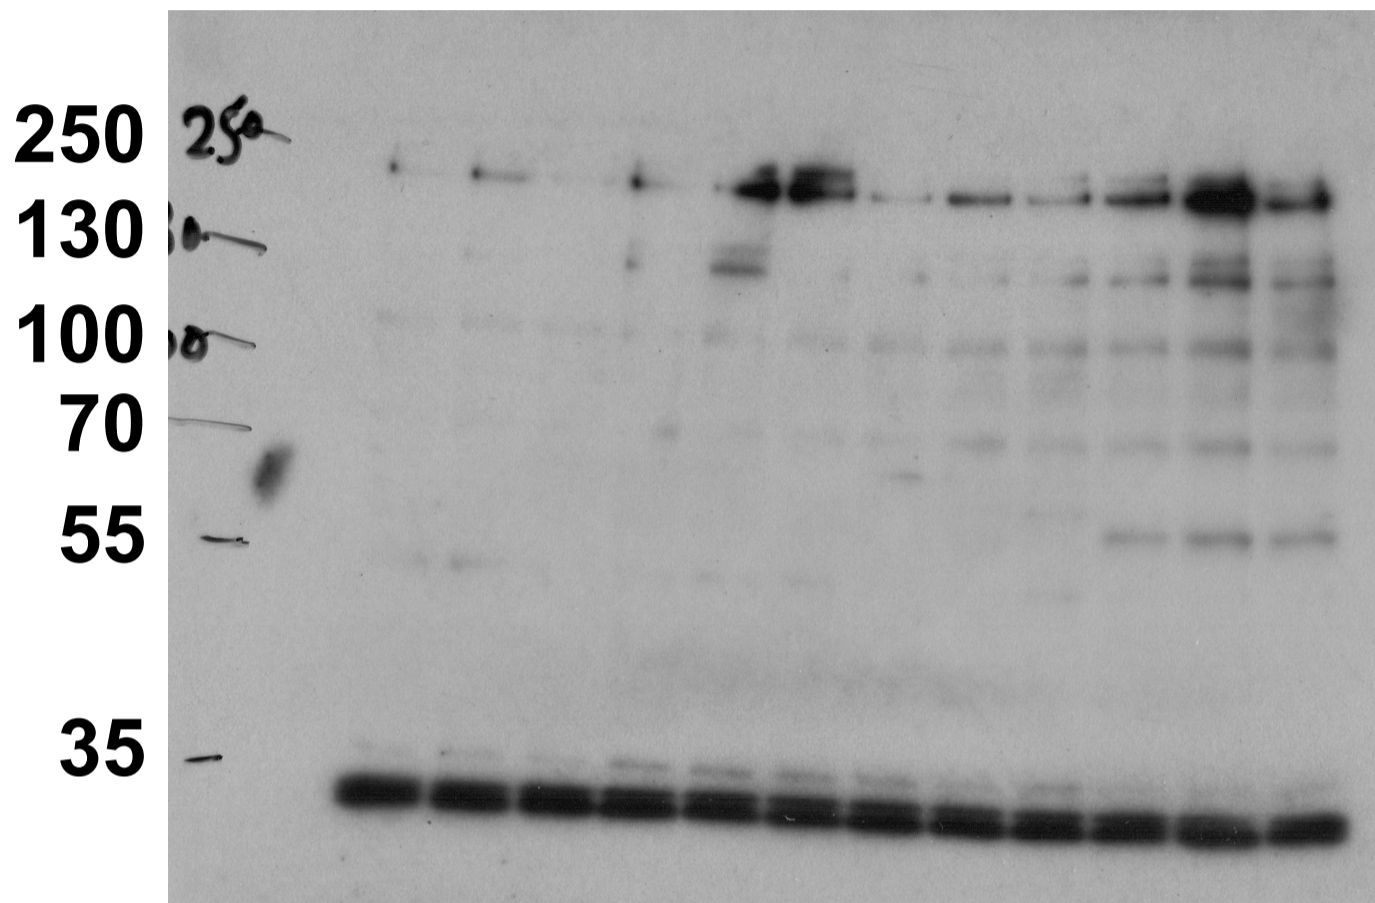

## b-actin

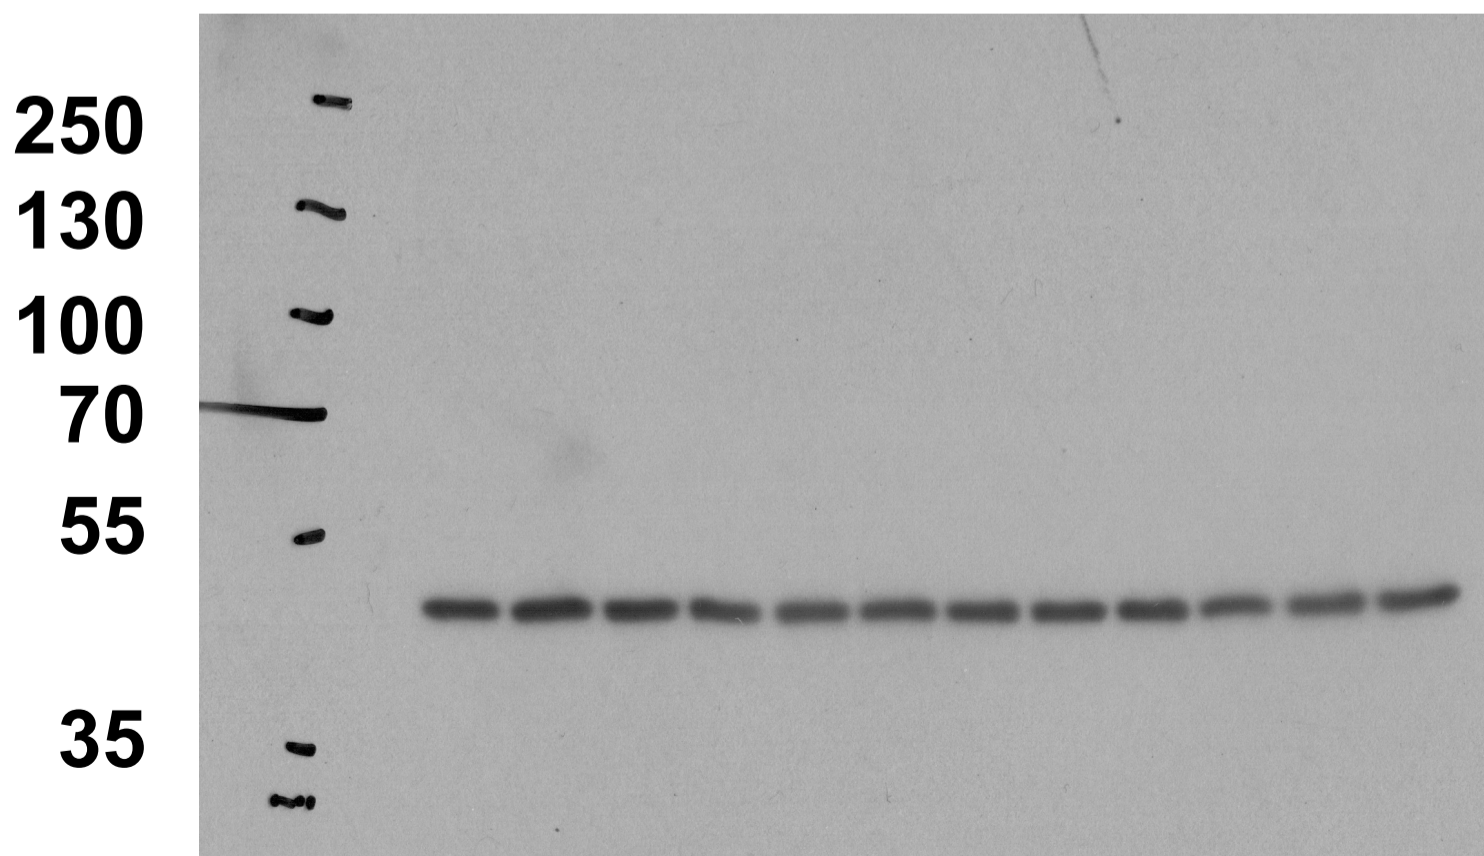

Supplement: EMBR-20-e46620-s002.pdf [file EMBR-20-e46620-s002.pdf]
