# Supplementary material
Source: PubMed Central journal article supplement (PMC6446204)
Supplement: EMBR-20-e46620-s003.pdf [file EMBR-20-e46620-s003.pdf]

# Fig. 3B source data

## p300

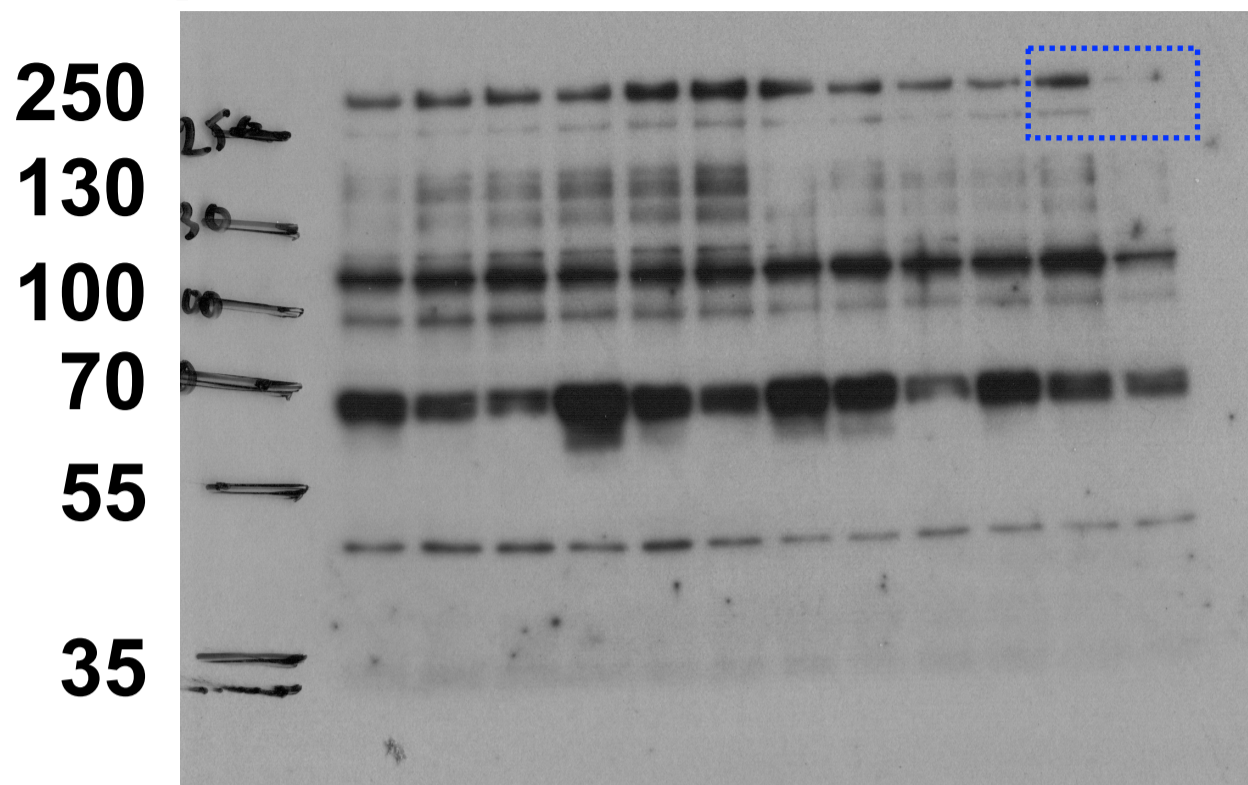

## GAPDH

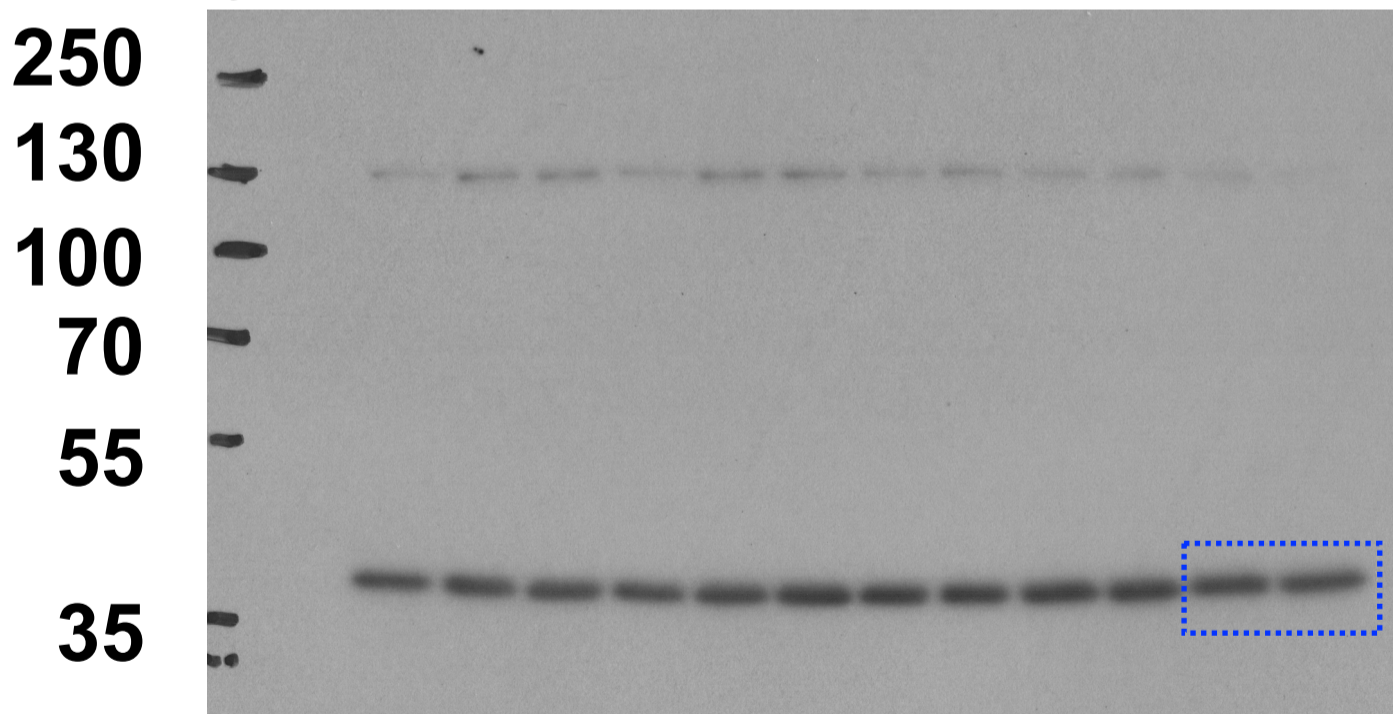

Data imaged with Xographer and film

MW markers visible are Thermo  
PageRuler Plus Prestained protein  
ladder (ThermoFischer)

Boxes indicate data shown on Fig. 3B

# Fig. 3B source data cont

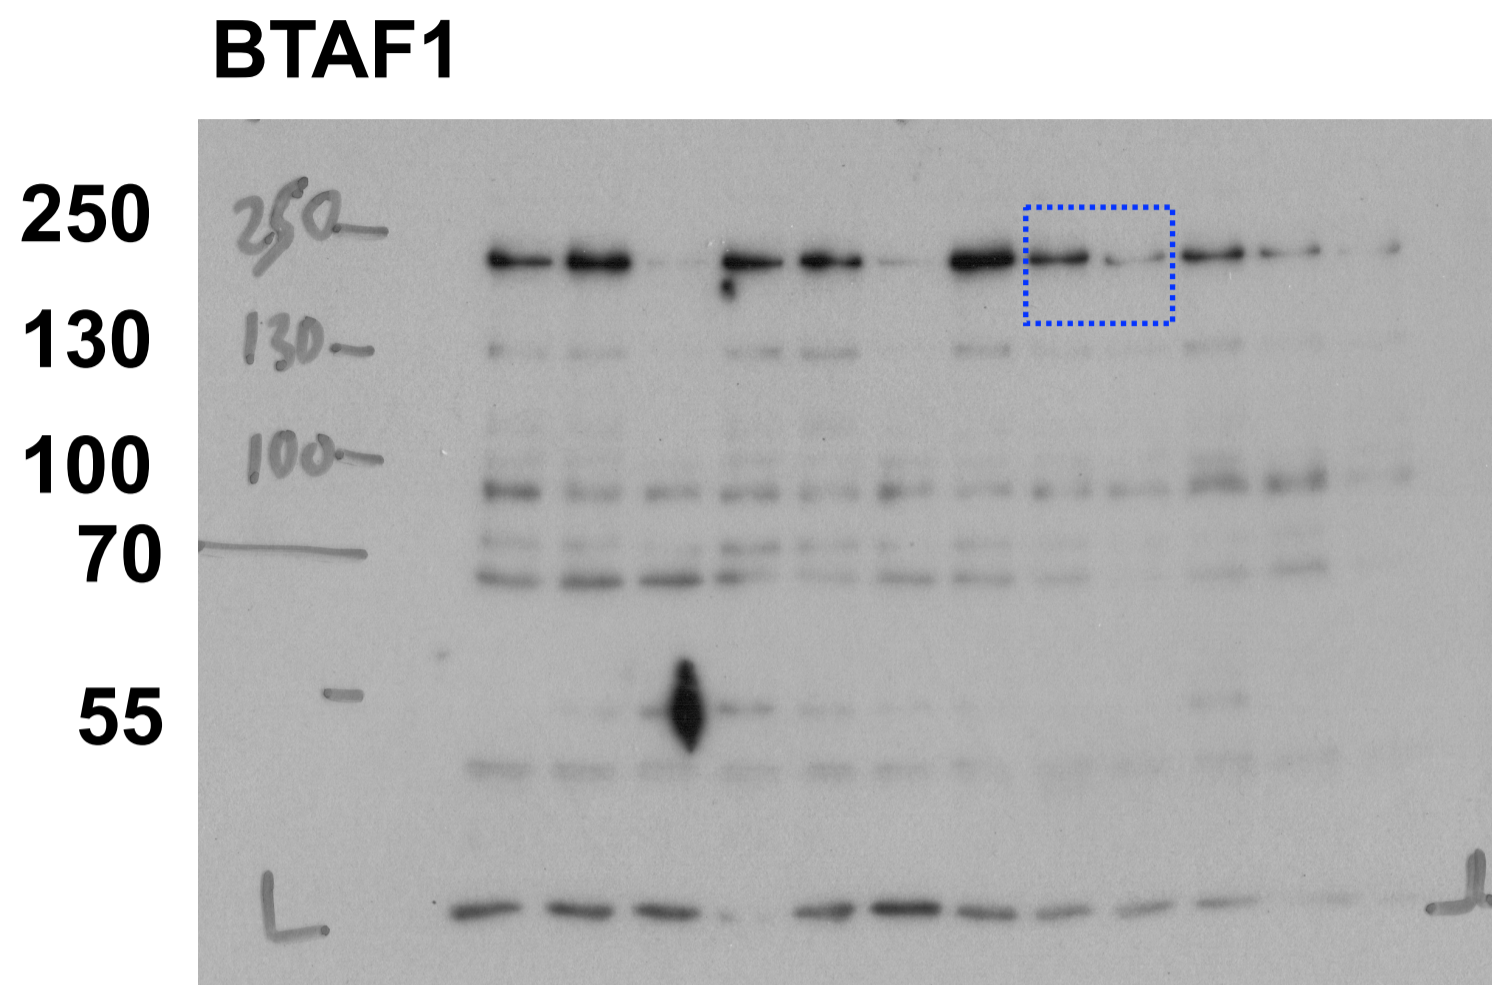

## GAPDH (control for BTA1 blot, not shown)

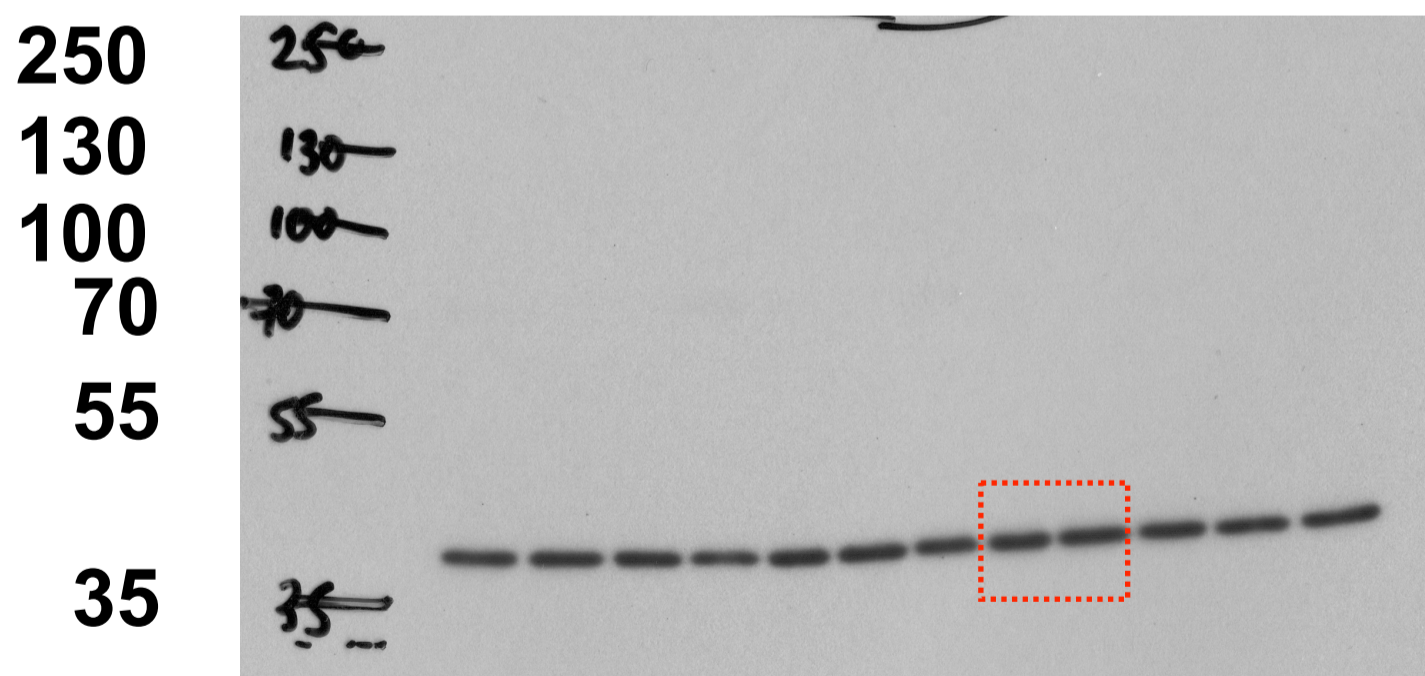

Data imaged with Xographer and film

MW markers visible are Thermo  
PageRuler Plus Prestained protein  
ladder (ThermoFischer)

Blue box indicates data shown on Fig.  
3B. Red box indicates Gapdh control for  
the BTA1 blot but is not shown on Fig  
3B.

# Fig. 3F source data

## Puromycin

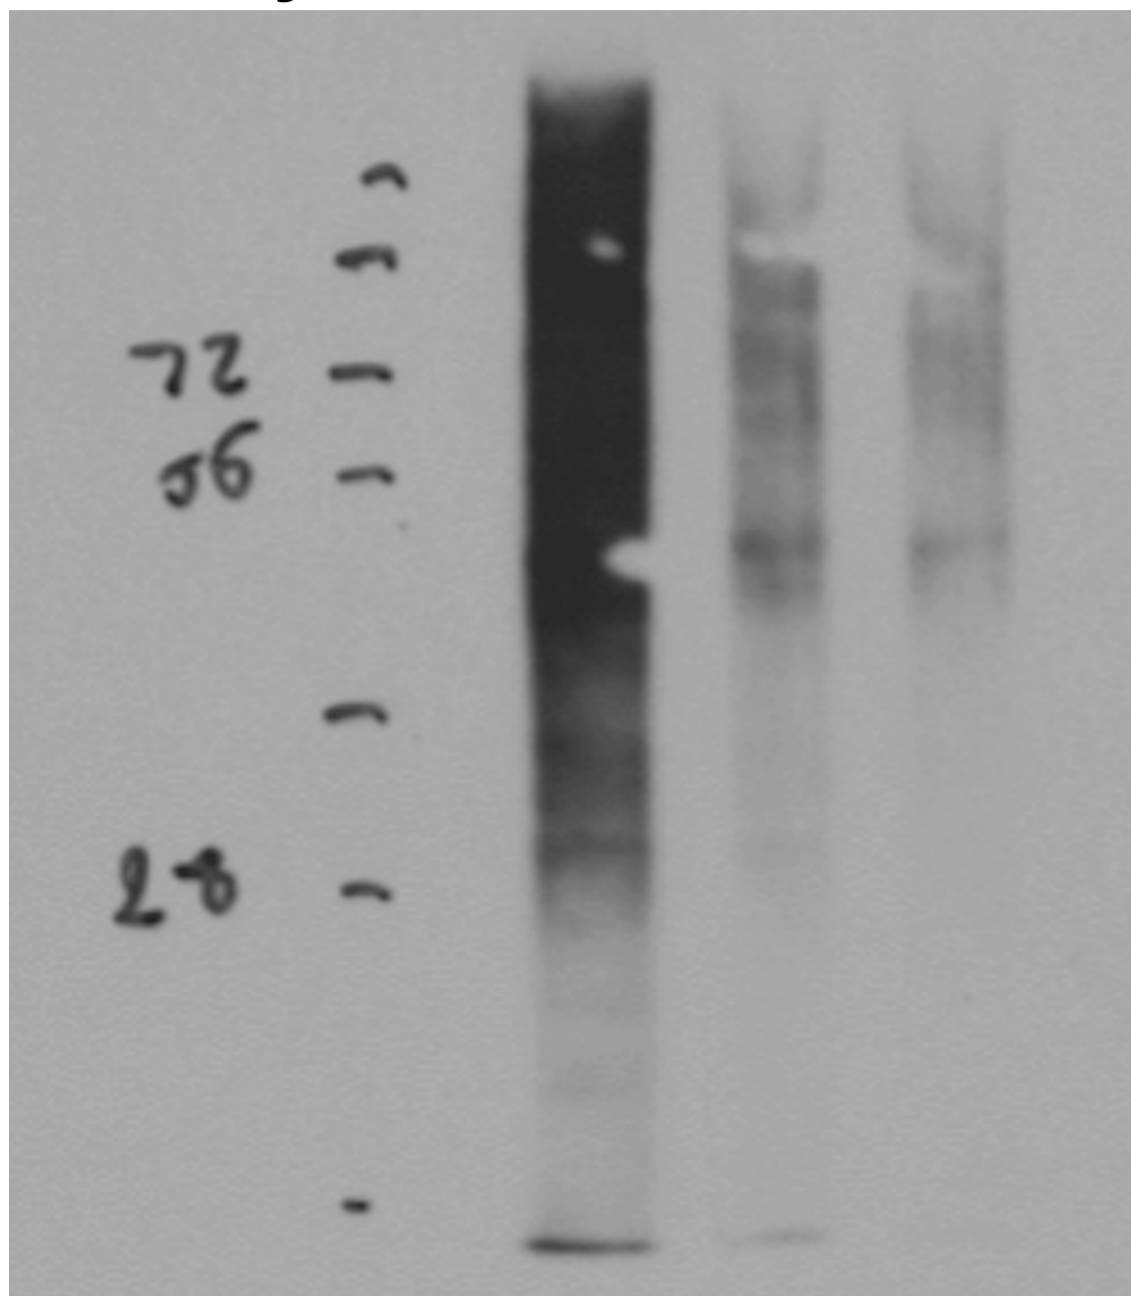

## Tubulin

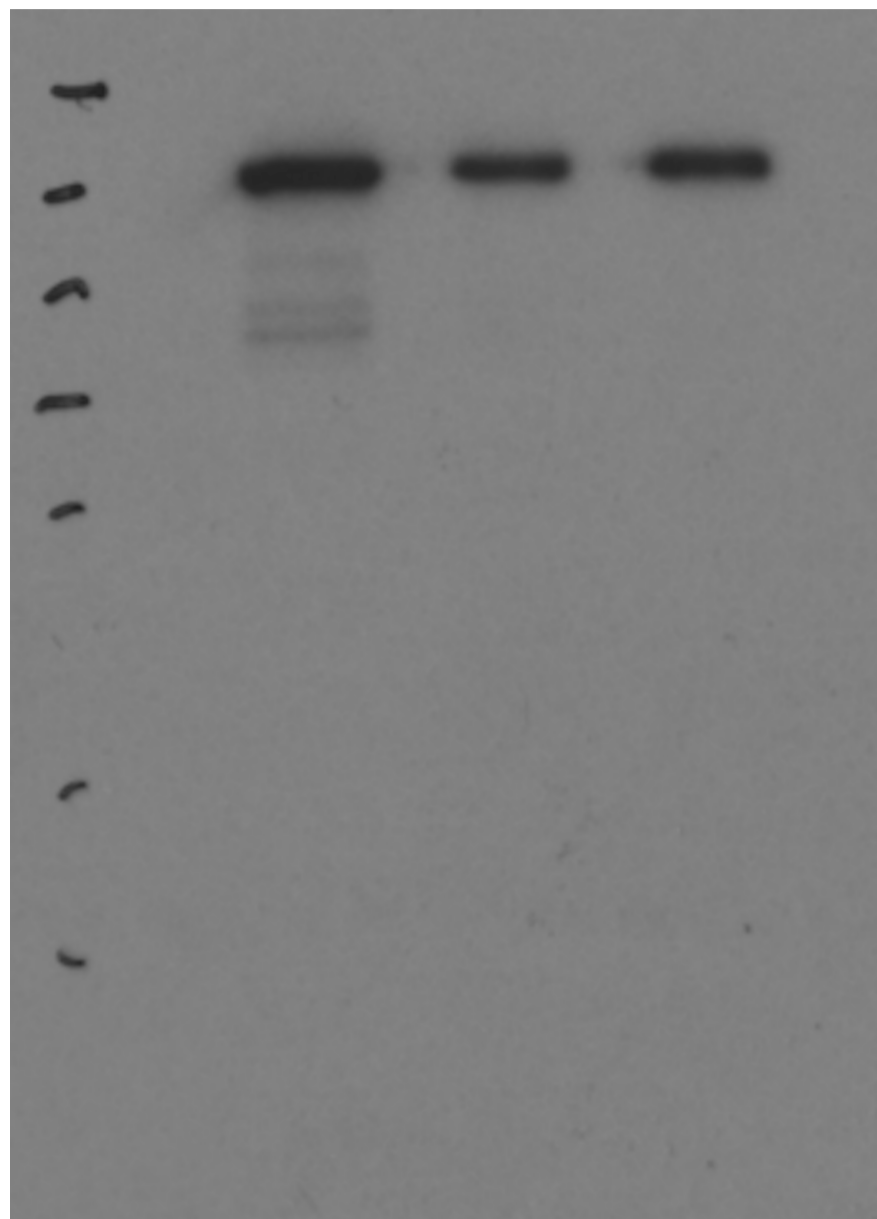

Data imaged with Xographer and film

MW markers visible are Thermo PageRuler Plus Prestained protein ladder (ThermoFischer)
